# Supplementary material for: amer1 Regulates Zebrafish Craniofacial Development by Interacting with the Wnt/β-Catenin Pathway
Source: MDPI journal article supplement (doi:10.3390/ijms25020734), 2024-01-05
Supplement: s1 [file s1]

**Supplementary Table S2. Sequences used in Cas9/gRNA design and validation PCR**

| Function          | Type               | Sequence (5'-3')          |
|-------------------|--------------------|---------------------------|
| Cas9/gRNA design* | T7-promoter        | TAATACGACTCACTATA         |
|                   | gRNA target R1     | AACCCCGGATGAGATAGACG      |
|                   | gRNA target R2     | GGCTCATTACGACCCTCCAG      |
|                   | gRNA target R3     | GGAGATCGCCACAAGATGTG      |
|                   | gRNA target R4     | AATATTGTTTCATAACTTGGG     |
|                   | Scaffold sequence  | GTTTTAGAACTAGAAATAGC      |
|                   | Tracr rev sequence | AAAAAAAGCACCGACTCGGTGCCAC |
| Validation PCR    | R1-Forward         | CATCCTGCTCCTCTGAGAACTT    |
|                   | R1-Reverse         | CATAAAGGGCATCACCCTGTA     |
|                   | R2-Forward         | ATCTCAGGAGTCCATCCAAAAA    |
|                   | R2-Reverse         | ACATCGAATGTTACAATGGCAG    |
|                   | R3-Forward         | CCTCAATGGATAGTTGCTCAAA    |
|                   | R3-Reverse         | TGATGCCACTTCACTGCTACTT    |
|                   | R4-Forward         | ACAATTGCCGTAGTCGTAACCT    |
|                   | R4-Reverse         | CTGGCTACATAAATGCAAAGCA    |

\* The structure of the forward primer is T7-promoter – R1/R2/R3/R4 – Scaffold sequence.
