# Supplementary material for: amer1 Regulates Zebrafish Craniofacial Development by Interacting with the Wnt/β-Catenin Pathway
Source: MDPI journal article supplement (doi:10.3390/ijms25020734), 2024-01-05
Supplement: s1 [file s1]

**Supplementary Table S1. Sequences of probes used in *in situ* hybridization**

| Gene           | Primer type | Sequence (5'-3')         |
|----------------|-------------|--------------------------|
| <i>crestin</i> | Forward     | CAGAAGCCCTCATCAGAGAGTTG  |
|                | Reverse     | GTTGCTTGTCCAGGCAGAATCAGG |
| <i>foxd3</i>   | Forward     | CCTACTCGTACATCGCCCTC     |
|                | Reverse     | CCGGGTTAAGGACAGGGAC      |
| <i>dlx2a</i>   | Forward     | CACAGTTCTGCTTTGCGTCG     |
|                | Reverse     | CCCAAGTCGGCAGAGTCAAA     |
| <i>barx1</i>   | Forward     | CTGGGCGGATCAGACTTCTC     |
|                | Reverse     | GCTTCTCGTGTCTCTCTCTG     |
| <i>sox9</i>    | Forward     | CCTCGACCCCTACCTGAAGA     |
|                | Reverse     | GGCGGGAGGTATTGGTCAAA     |
| <i>col2a1a</i> | Forward     | TCTGAAGTCCATCAACGGGC     |
|                | Reverse     | TTTTCCGTCACGCTAAACGC     |
| <i>fgf3</i>    | Forward     | GAATCTCTGGCTCCGAGGCT     |
|                | Reverse     | GCCGCTGACTCTCTCTAAGC     |
| <i>tbx1</i>    | Forward     | GCAGCTGTCCCATTTTTCG      |
|                | Reverse     | ACGGCGGTAAATCTGGTCTC     |
| <i>nkx2.3</i>  | Forward     | TCGTGTTTTCTCGGAGGTGG     |
|                | Reverse     | GCGCATTAGTGGACGTGTTC     |
